# Supplementary material for: Low temperature self-assembled synthesis of hexagonal plate-shape Mn3O4 3D hierarchical architectures and their application in electrochemical capacitors
Source: Royal Society of Chemistry journal article supplement (doi:10.1039/c5ra08697c), 2015-01-01
Supplement: c5ra08697c1.pdf [file c5ra08697c1.pdf]

## Electronic Supplementary Information

### Low Temperature Self-Assembled Synthesis of Hexagonal Plate-Shape $\text{Mn}_3\text{O}_4$ 3D

#### Hierarchical Architectures and their Application in Electrochemical Capacitors

Zhenxin Liu <sup>†,‡</sup>, Yu Xing <sup>‡,\*</sup>, Shaoming Fang <sup>‡,\*</sup>, Xiongwei Qu <sup>†,\*</sup>, Depeng Wu <sup>‡</sup>, Aiqin

Zhang <sup>‡</sup>, and Bei Xu <sup>‡</sup>

<sup>†</sup>School of Materials Science and Engineering, Hebei University of Technology, Tianjin, 300130, China.

<sup>‡</sup>Henan Provincial Key Laboratory of Surface and Interface Science, School of Materials and Chemical Engineering, Zhengzhou University of Light Industry, Zhengzhou, 450002, China.

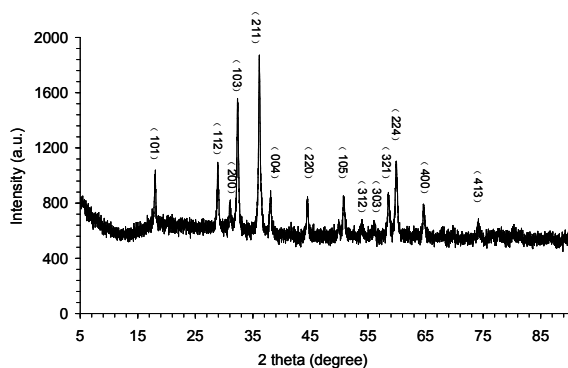

**Figure S1.** XRD pattern of  $\text{Mn}_3\text{O}_4$  synthesized at  $120^\circ\text{C}$  for 2h (sample S2).

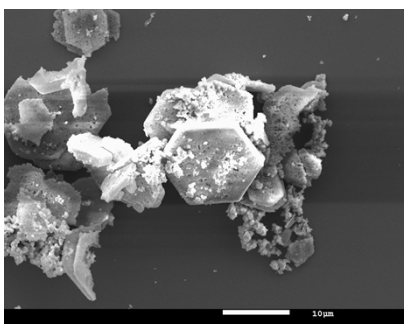

**Figure S2.** FE-SEM image of  $\text{Mn}_3\text{O}_4$  hexagonal plates (sample S6) after 4 minutes sonication.

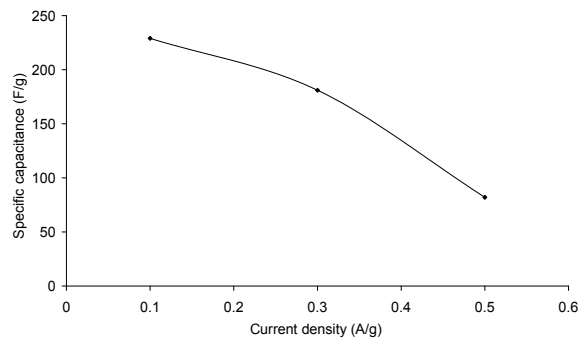

**Figure S3.** Specific capacitance of  $\text{Mn}_3\text{O}_4$  hexagonal plates (sample S6) at different current densities.
